# Supplementary material for: The intestinal permeability marker FITC-dextran 4kDa should be dosed according to lean body mass in obese mice
Source: Springer Nature journal article supplement (doi:10.1038/s41387-022-00230-2), 2023-01-05
Supplement: MOESM1 [file 41387_2022_230_MOESM1_ESM.pdf]

Supplemental Material

| Mean 1 | Mean 2 | SD   | Enrolment ratio | Alpha | Beta | Sample size |
|--------|--------|------|-----------------|-------|------|-------------|
| 1.23   | 0.73   | 0.58 | 1               | 0.05  | 0.2  | 21/grp      |

**Table 1 power calculation.** To calculate appropriate sample size to test for increased permeability in high fat fed mice using the lean-body-mass regimen, we used a power calculation based on parameters from the first study [1].

[1] Rosner B (2011) Fundamentals of biostatistics. Seventh edition. Boston : Brooks/Cole, Cengage Learning, [2011] ©2011

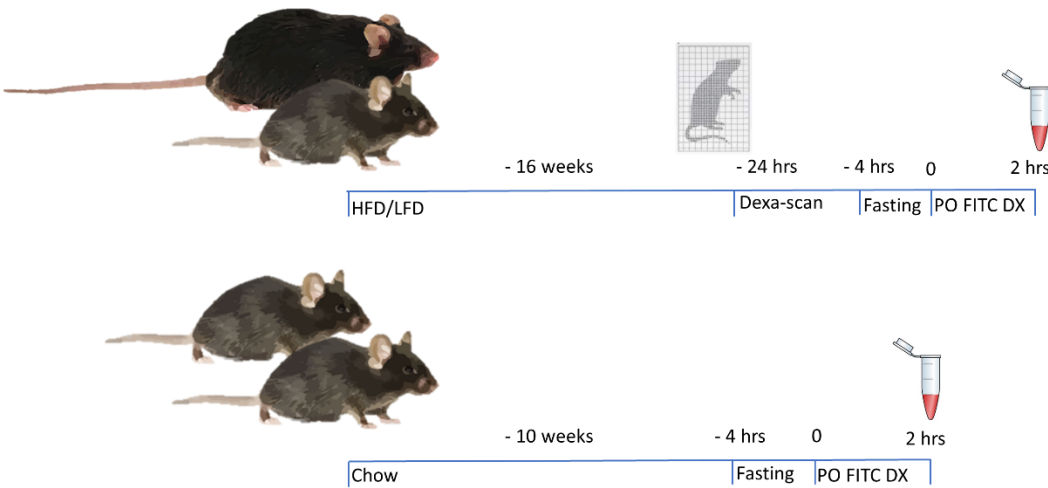

**Figure 1 Study design with time indications.** The upper panel illustrates study 1 and the power corrected study. The lower panel illustrates the Dose-response study in lean mice. Mice were fed the assigned diet for 10-16 weeks. On the study day, mice were fasted 4 hours, dosed with FITC dextran 4 kDa PO and blood were sampled 2 hours post-dosing.

| Gene                | Assay ID      | Gene bank      |
|---------------------|---------------|----------------|
| <i>Cldn 1</i>       | Mm00516701_m1 | NM_016674.4    |
| <i>Cldn 7</i>       | Mm00516817_m1 | NM_001193619.1 |
| <i>Cldn 8</i>       | Mm00516972_s1 | NM_018778.3    |
| <i>E-cad (Cdh1)</i> | Mm01247357_m1 | NM_009864.2    |
| <i>Jam-1 (F11r)</i> | Mm00554113_m1 | NM_172647.2    |
| <i>Sdha</i> *       | Mm01352366_m1 | NM_023281.1    |

**Table 2 TaqMan Assays gene of interest and house-keeping gene\*.**

| Group                                      | Lean LM dose             | Lean BW dose           | DIO LM dose              | DIO BW dose              |
|--------------------------------------------|--------------------------|------------------------|--------------------------|--------------------------|
| Body weight (g)                            | 27.2 ± 1.1 (25.5 - 28.5) | 27.3 ± 1.5 (24 - 29.1) | 55.9 ± 3.4 (51.7 - 62.2) | 55.5 ± 2.5 (51.5 - 58.1) |
| Lean mass (g)                              | 24.8 ± 1.1 (23.2 - 26.2) | -                      | 31.3 ± 1.4 (29.6- 33.2)  | -                        |
| Fat mass (g)                               | 1.7 ± 0.5 (1.1 - 2.4)    | -                      | 23.7 ± 2.4 (21 - 29.1)   | -                        |
| Gastro-intestinal weight (g)               | 2.2 ± 0.2 (2.1 - 2.5)    | 2 ± 0.3 (1.3 - 2.3)    | 2.1 ± 0.2 (1.8 - 2.4)    | 2.3 ± 0.4 (1.6 - 2.8)    |
| Liver weight (g)                           | 1.2 ± 0.1 (1.01 - 1.3)   | 1.2 ± 0.2 (0.7 - 1.4)  | 3.3 ± 1.1 (1.5 - 4.7)    | 3.6 ± 0.35 (3.1 - 4.2)   |
| Liver weight normalized to body weight (%) | 4.5                      | 4.3                    | 6                        | 6.5                      |

**Table 3 Overall measurements in the four groups.** The two diet groups, lean mice on the low-fat diet and DIO mice on the high-fat diet, were divided into two subgroups, each allocated to one of two test dose regimens, dose due to lean mass, LM, and dose due to body weight, BW (n=10/grp). Mice were weighed, and the LM groups were also DEXA-scanned before study initiation. Mice were fasted for 4 hours and FITC dextran 4 kDa were dosed orally due to BW or LM. 2 hours after dosing, a blood sample was collected, and the concentration as a measure for intestinal permeability was calculated. After study termination the weight of the intestines and livers were measured. Data ±SD (min-max), g=gram.
